# Supplementary material
Source: PubMed Central journal article supplement (PMC5573224)
Supplement: NIHMS893939-supplement-6.pdf [file NIHMS893939-supplement-6.pdf]

| TREM2 variant carrier |           |             |                   |          |              | Case-matched control |           |             |                   |          |              |
|-----------------------|-----------|-------------|-------------------|----------|--------------|----------------------|-----------|-------------|-------------------|----------|--------------|
| Sex                   | Age (yrs) | Braak Stage | CDR (est. at TOD) | CERAD    | TREM2 status | Sex                  | Age (yrs) | Braak Stage | CDR (est. at TOD) | CERAD    | TREM2 status |
| Female                | 93.98     | N.A.        | 3                 | N.D.     | R47H/CV      | Female               | 95.73     | VI          | 3                 | Definite | CV/CV        |
| Male                  | 74.85     | V           | 2                 | Definite | R47H/CV      | Male                 | 71.6      | VI          | 3                 | Definite | CV/CV        |
| Male                  | 83.75     | N.A.        | 3                 | N.D.     | R47H/CV      | Male                 | 87.57     | V           | 3                 | Definite | CV/CV        |
| Male                  | 90.64     | V           | 3                 | Definite | R47H/CV      | Male                 | 91.08     | V           | 1                 | Definite | CV/CV        |
| Female                | 88.22     | IV          | 3                 | Definite | R47H/CV      | Female               | 84.47     | V           | 3                 | Definite | CV/CV        |
| Male                  | 85.64     | V           | 3                 | Definite | R47H/CV      | Male                 | 80.97     | VI          | 3                 | Definite | CV/CV        |
| Male                  | 78.23     | V           | 3                 | Definite | R47H/CV      |                      |           |             |                   |          |              |
| Female                | 83.16     | N.A.        | 3                 | N.D.     | R62H/CV      | Female               | 85.43     | N.A.        | 3                 | N.D      | CV/CV        |
| Female                | 89.31     | VI          | 3                 | Definite | R62H/CV      |                      |           |             |                   |          |              |
| Female                | 89.37     | N.A.        | 3                 | N.D.     | R62H/CV      |                      |           |             |                   |          |              |
| Female                | 78.98     | N.A.        | 3                 | N.D.     | R62H/CV      | Female               | 81.26     | VI          | 3                 | Definite | CV/CV        |

**Table S1. Characteristics of human tissue donors. Related to Figure 1.**

Sex, age, Braak stage, estimated CDR (Clinical Dementia Rating) at time of death, CERAD (Consortium to Establish a Registry for Alzheimer's Disease) defined AD status, and *TREM2* alleles of AD patients from which post-mortem specimens were derived. CV (common variant), N.A. (not assessed), N.D. (not done).
