# Supplementary material
Source: PubMed Central journal article supplement (PMC5573224)
Supplement: NIHMS893939-supplement-7.pdf [file NIHMS893939-supplement-7.pdf]

| Antibody                   | Company                     | Cat. Number |
|----------------------------|-----------------------------|-------------|
| anti-Pan Actin             | Cell Signaling Technologies | 4968        |
| anti-p62                   | Cell Signaling Technologies | 8025        |
| anti-phospho Akt 473       | Cell Signaling Technologies | 9271        |
| anti-phospho Ulk1 317      | Cell Signaling Technologies | 12753       |
| anti-phospho Ulk1 757      | Cell Signaling Technologies | 6888        |
| anti-phospho NDRG1         | Cell Signaling Technologies | 3217        |
| anti-phospho S6K           | Cell Signaling Technologies | 2710        |
| anti-phospho 4EBP1         | Cell Signaling Technologies | 2855        |
| anti-Akt                   | Cell Signaling Technologies | 9272        |
| anti-S6K                   | Cell Signaling Technologies | 9202        |
| anti-phospho AMPK $\alpha$ | Cell Signaling Technologies | 2535        |
| anti-AMPK $\alpha$         | Cell Signaling Technologies | 5832        |
| anti-LC3                   | Cell Signaling Technologies | 4108        |
| anti-phospho mTOR 2448     | Cell Signaling Technologies | 2971        |

**Table S2. Antibodies used for immunoblotting. Related to Figures 2, 3, 5, 7, S3, and S4.**
