# Supplementary material
Source: PubMed Central journal article supplement (PMC5573224)

A

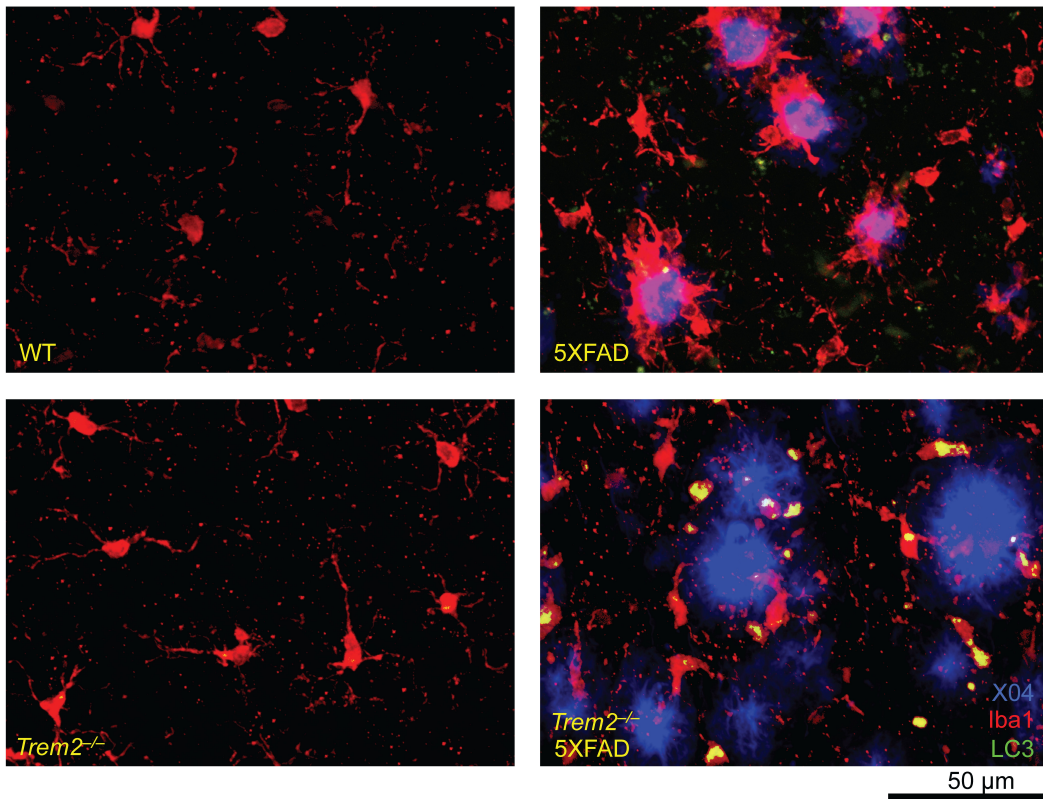

Figure S1

Supplement: NIHMS893939-supplement-1.pdf [file NIHMS893939-supplement-1.pdf]

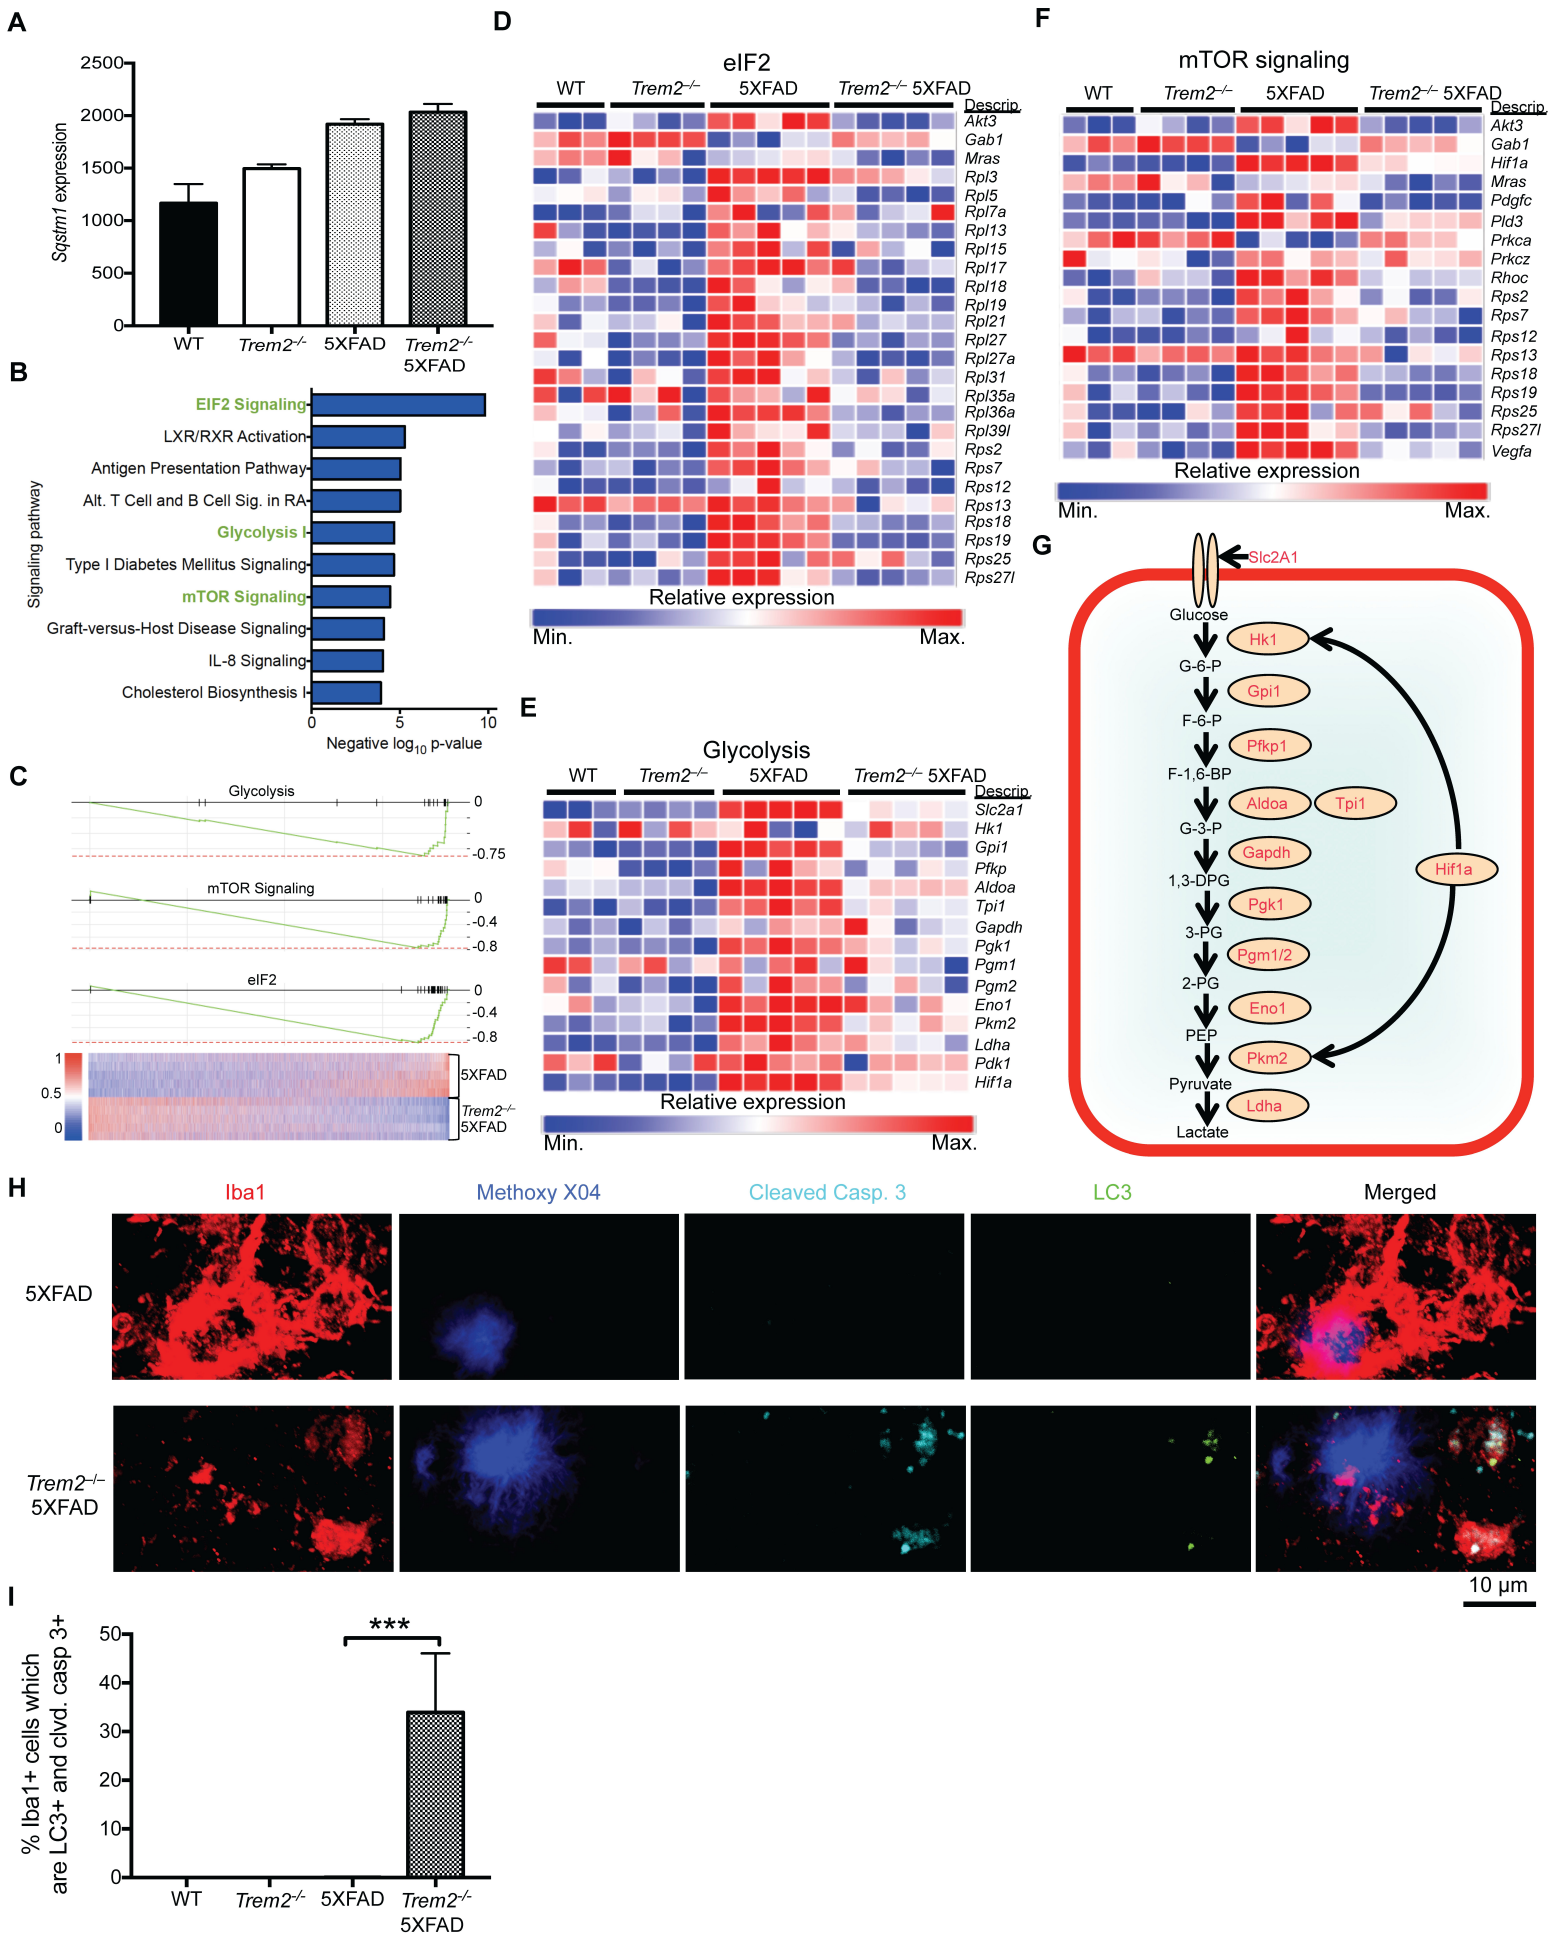

Figure S2

Supplement: NIHMS893939-supplement-2.pdf [file NIHMS893939-supplement-2.pdf]

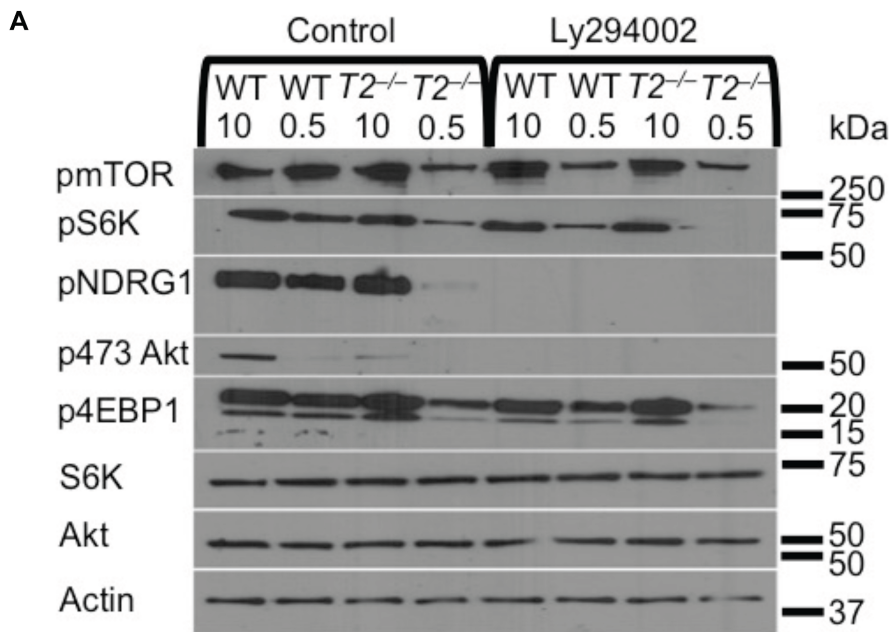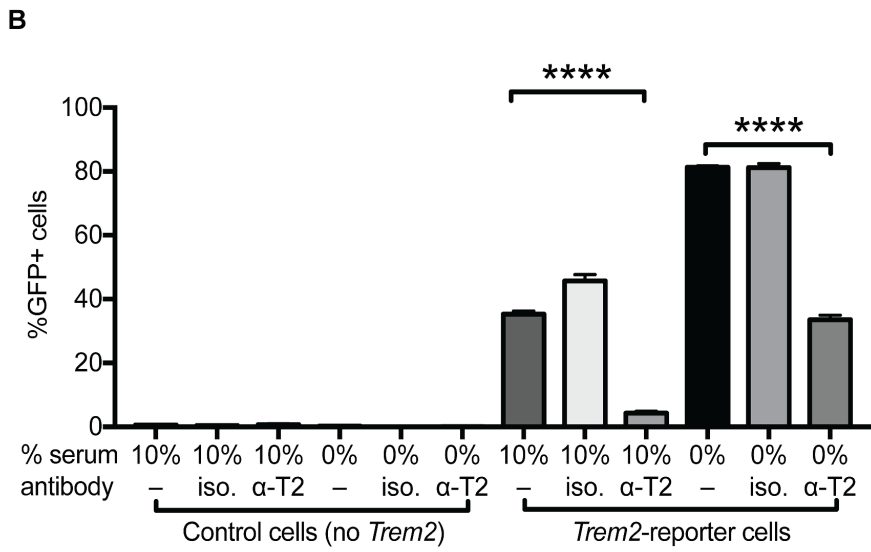

Figure S3

Supplement: NIHMS893939-supplement-3.pdf [file NIHMS893939-supplement-3.pdf]

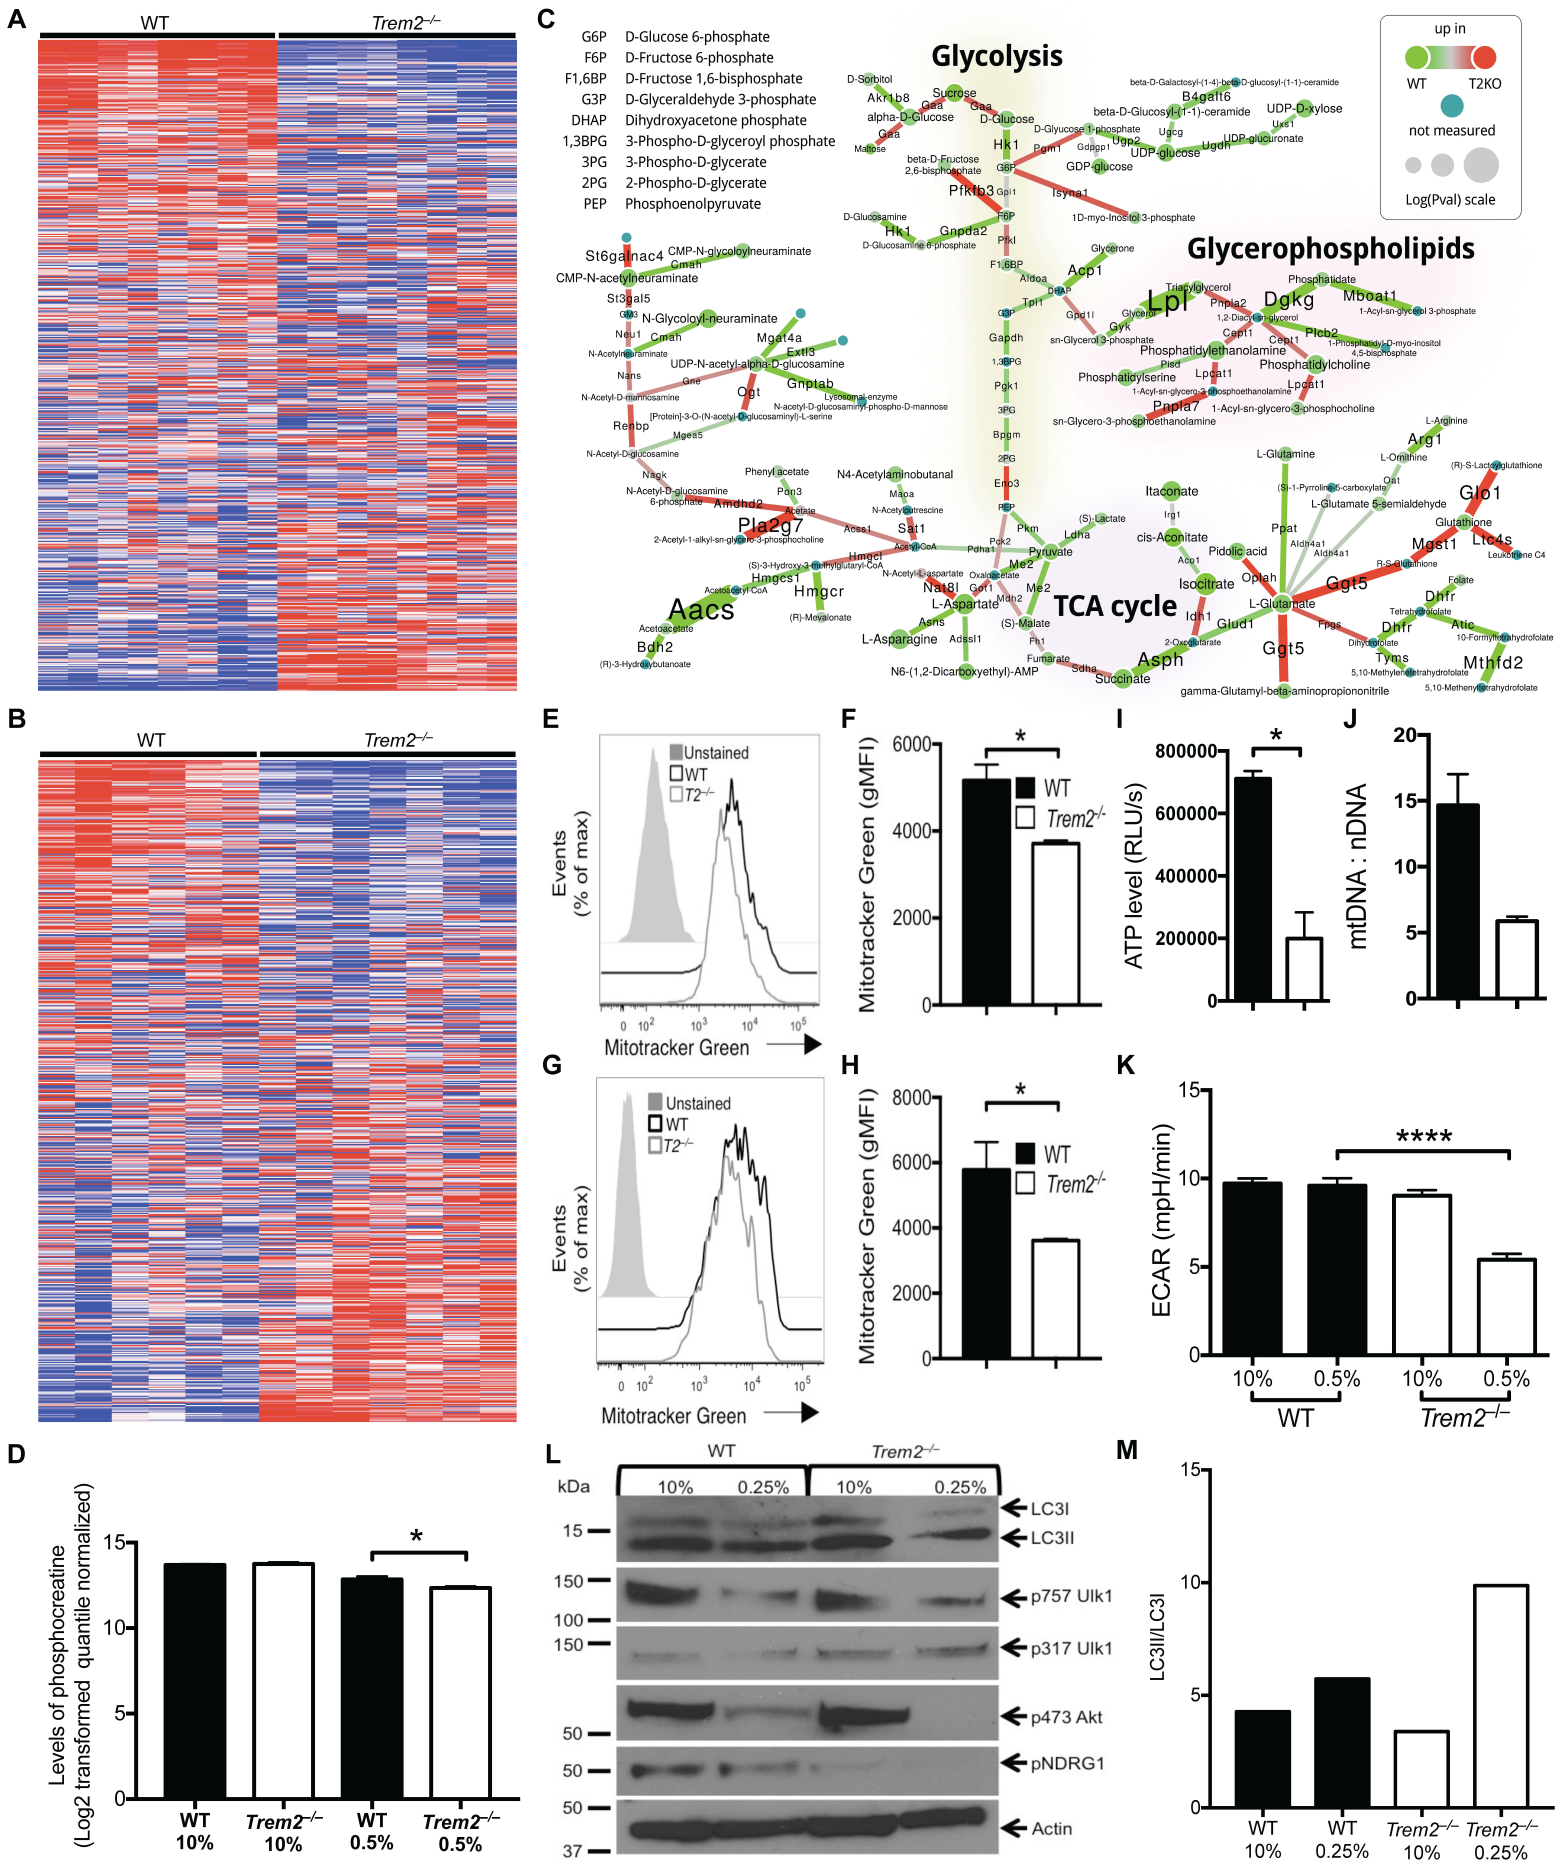

Figure S4

Supplement: NIHMS893939-supplement-4.pdf [file NIHMS893939-supplement-4.pdf]

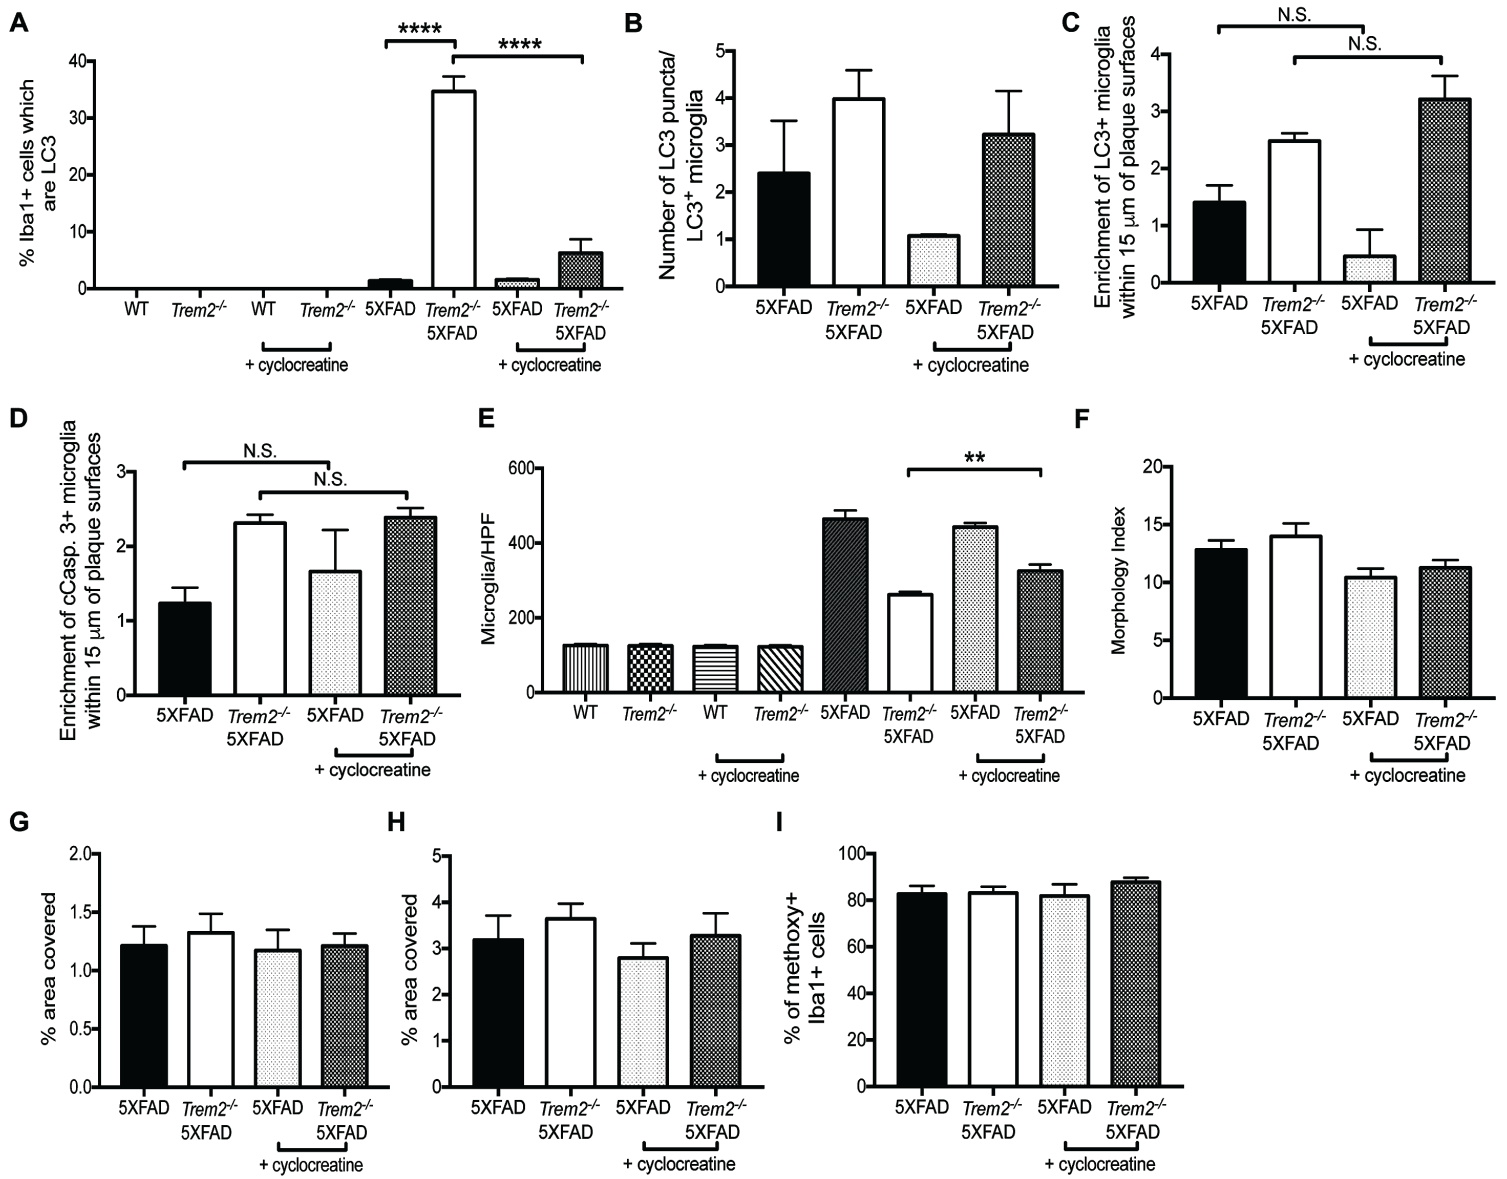

Figure S5

Supplement: NIHMS893939-supplement-5.pdf [file NIHMS893939-supplement-5.pdf]
